# Supplementary material for: A 3D porous architecture of Si/graphene nanocomposite as high-performance anode materials for Li-ion batteries
Source: Royal Society of Chemistry journal article supplement (doi:10.1039/c2jm00120a), 2012-01-01
Supplement: c2jm00120a.pdf [file c2jm00120a.pdf]

## Electronic Supplementary Information for

### **A 3D porous architecture of Si/Graphene nanocomposite as high-performance anode materials for Li-ion batteries**

**Xing Xin,<sup>a</sup> Xufeng Zhou,<sup>a</sup> Feng Wang,<sup>b</sup> Xiayin Yao,<sup>a</sup> Xiaoxiong Xu,<sup>a</sup> Yimei Zhu,<sup>\*b</sup> and Zhaoping Liu,<sup>\*a</sup>**

<sup>a</sup> Ningbo Institute of Material Technology and Engineering, Chinese Academy of Sciences, Ningbo, Zhejiang 315201, P.R.China. Fax: +8657486685096; Tel: +8657486685096; E-mail: liuzp@nimte.ac.cn

<sup>b</sup> Condensed Matter Physics and Material Science Department, Brookhaven National Laboratory, Upton, New York, 11973, USA  
E-mail: zhu@bnl.gov

#### **Experimental details of GO preparation**

6.0 g of KNO<sub>3</sub> and 6.0 g of natural graphite (300 mesh) were added to 270 cm<sup>3</sup> of concentrated H<sub>2</sub>SO<sub>4</sub> (98wt.%) at room temperature, and stirred for 10 minutes before slowly adding 36 g of KMnO<sub>4</sub> into the mixture. The above mixture was then heated to 40°C and stirred for 6 hrs. Subsequently, under vigorous stirring, 480 cm<sup>3</sup> of water was rapidly added, causing a quick rise in temperature to ~60°C. After, the slurry was continuously stirred at this temperature for another 30 minutes before 1200 cm<sup>3</sup> of water and 36 cm<sup>3</sup> of H<sub>2</sub>O<sub>2</sub> solution (30wt.%) were added sequentially to dissolve insoluble manganese species. Finally, the resulting graphite oxide suspension was washed repeatedly in water until the solution pH reached a constant value of ~5.0. The graphite oxide became partially delaminated during washing. We assured the complete delamination of graphite oxide into GO by more mechanical stirring and ultrasonic treatment.

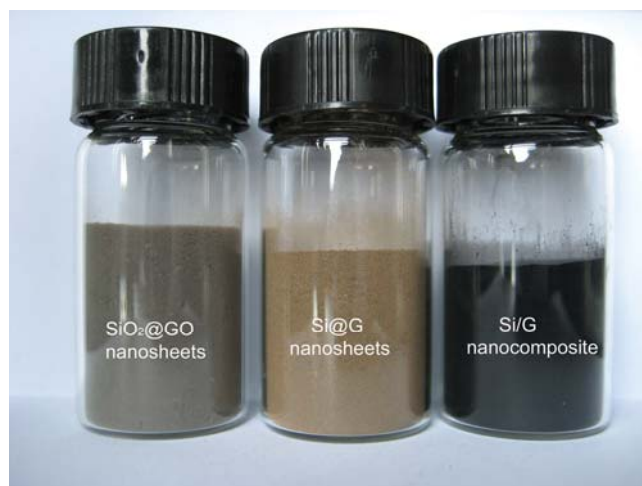

**Fig. S1** Digital photographs of the samples prepared at different stages.

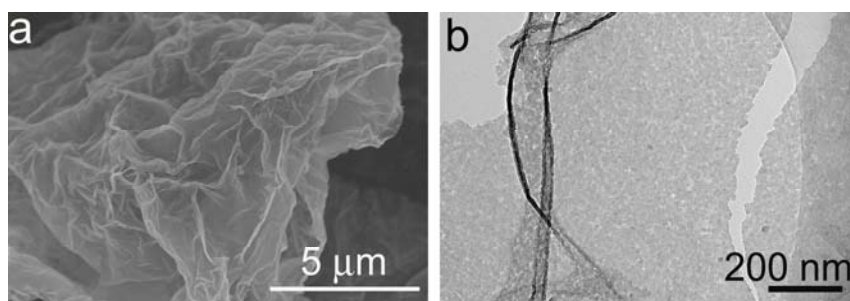

**Fig. S2** (a) SEM image of the  $\text{SiO}_2@\text{GO}$  nanosheets. (b) TEM image of the calcinated  $\text{SiO}_2@\text{GO}$  nanosheets, which shows thin layers of  $\text{SiO}_2$  nanoparticles after removing GO at 600 °C in air.

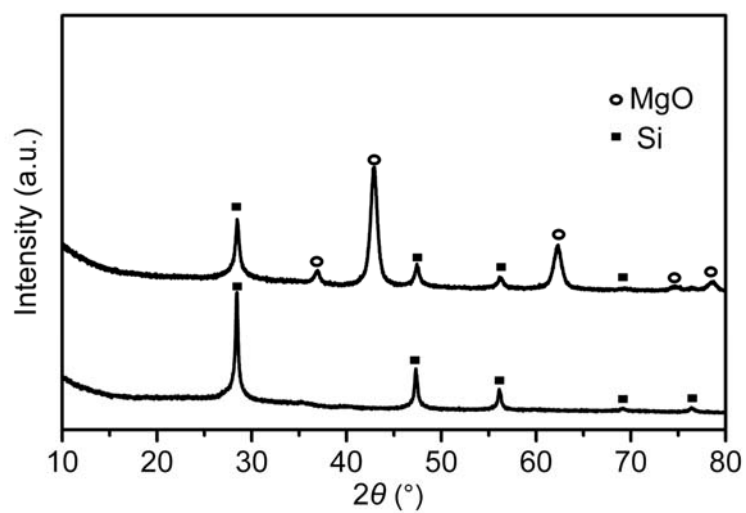

**Fig. S3** (a) XRD patterns of (top) the Mg-reduced product and (bottom) the  $\text{Si@G}$  nanosheets after removing the MgO byproduct.

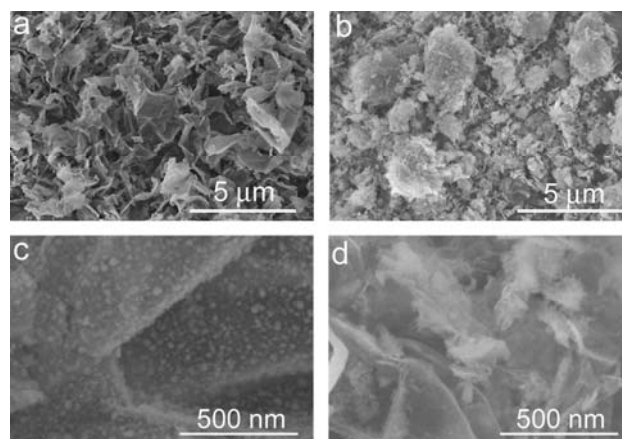

**Fig. S4** SEM images of the Si@G nanosheets before (a, c) and after (b, d) HF washing. As can be seen, after removing  $\text{SiO}_x$  the nanosheets become severe agglomeration and the nanosheets show smooth surfaces without attachment of the Si nanoparticles.

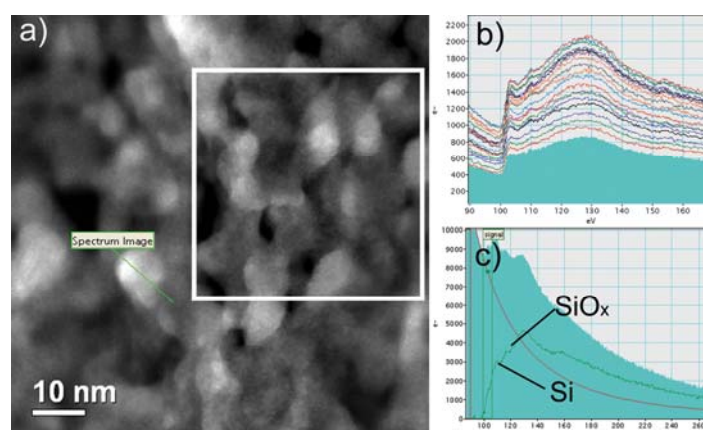

**Fig. S5** (a) STEM image showing part of a microsphere, (b) EELS line scan recorded along the green line marked in (a), and (c) Si L23 edge spectrum from the selected area in (a), showing the near-edge fine structure for elemental Si around 110 eV, and features at higher energies that may be assigned to  $\text{SiO}_x$ .

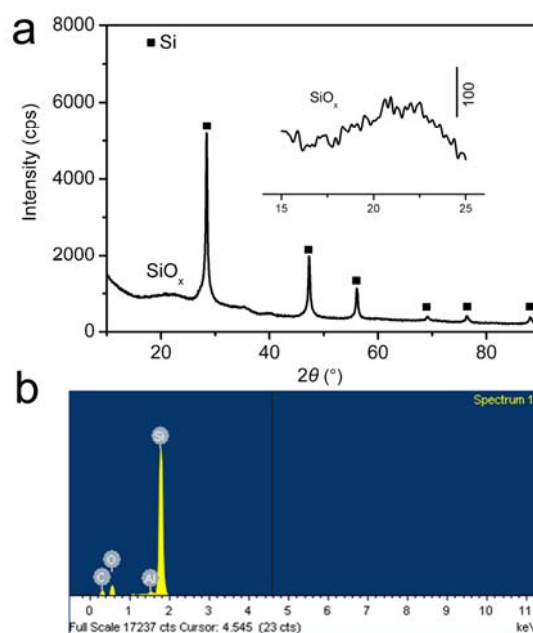

**Fig. S6** (a) XRD pattern of the final product, Si/G nanocomposite. The inset is an enlargement of the pattern between 15-25°. (b) Energy dispersive X-ray spectrum (EDS).

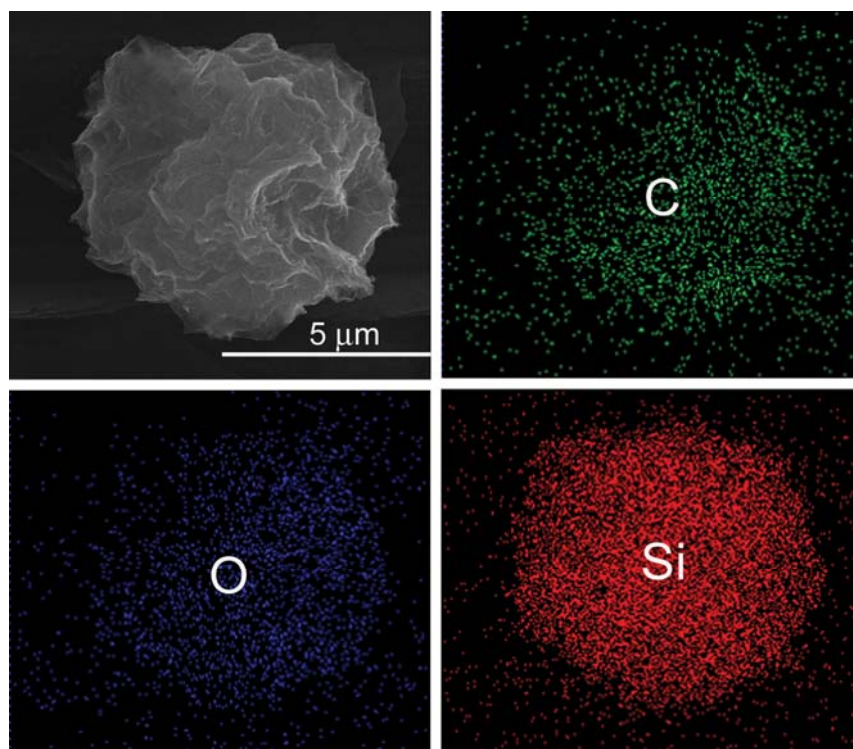

**Fig. S7** Elemental maps of carbon, oxygen and silicon of an individual Si/G microsphere.

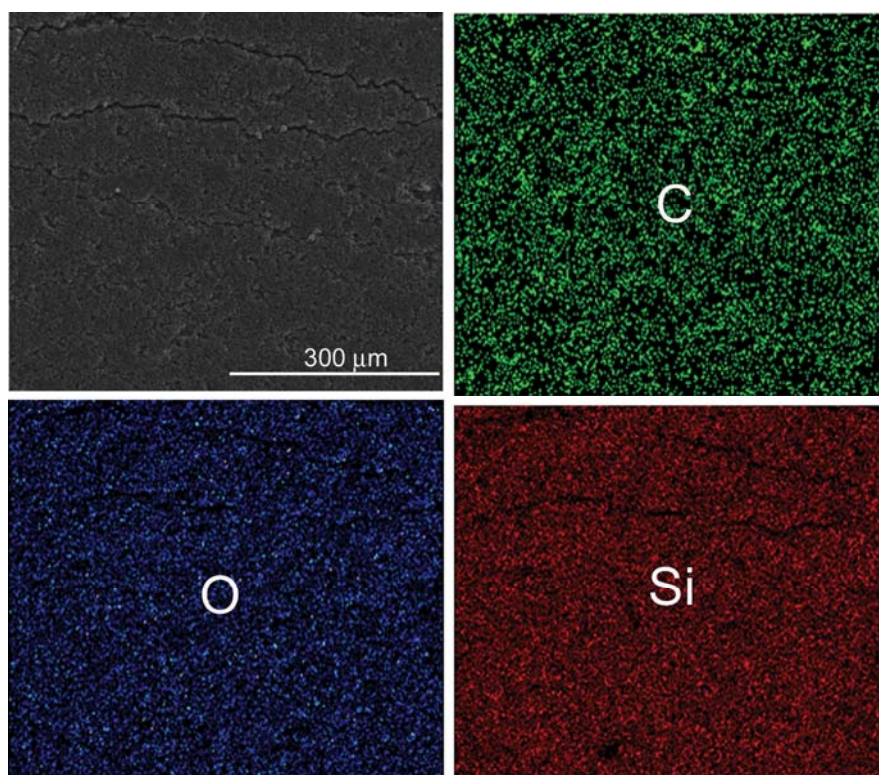

**Fig. S8** Elemental maps of the electrode of Si/G nanocomposite after 100 mA g<sup>-1</sup> to 1 A g<sup>-1</sup> rate cycles. The electrode maintains the smooth, integrated surface, and the Si, C, O elements distribute homogeneously as the electrode before cycles.

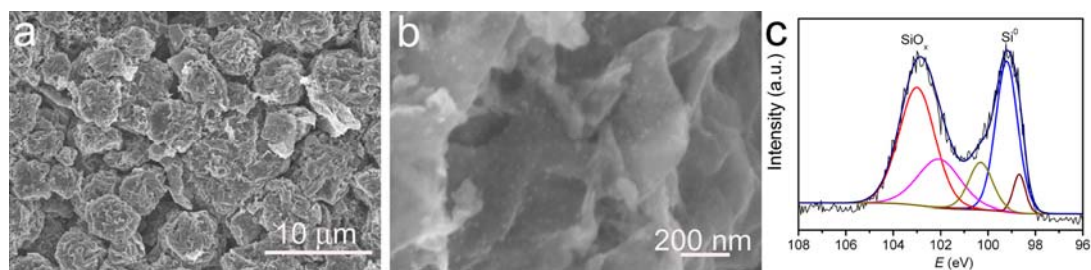

**Fig. S9** (a, b) SEM images of the Si/G nanocomposite after 100  $\text{mA g}^{-1}$  to 1  $\text{A g}^{-1}$  rate cycles. As can be seen, the micro spherical morphology was maintained, and the Si nanocrystals did not fall off from the graphene sheets. (c) XPS spectrum of the Si/G nanocomposite after cycles.
